# Supplementary material for: Biomass burning at Cape Grim: exploring photochemistry using multi-scale modelling
Source: Copernicus journal article supplement (doi:10.5194/acp-2016-932), 2016-12-05
Supplement: Supplementary file [file acp-2016-932-AC3-supplement.pdf]

# 1 Supplementary Material

## 2 Biomass burning at Cape Grim: exploring photochemistry using 3 multi-scale modelling

4 S. J. Lawson, M. Cope, S. Lee, I.E. Galbally, Z. Ristovski and M.D. Keywood

5 ACP-2016-932

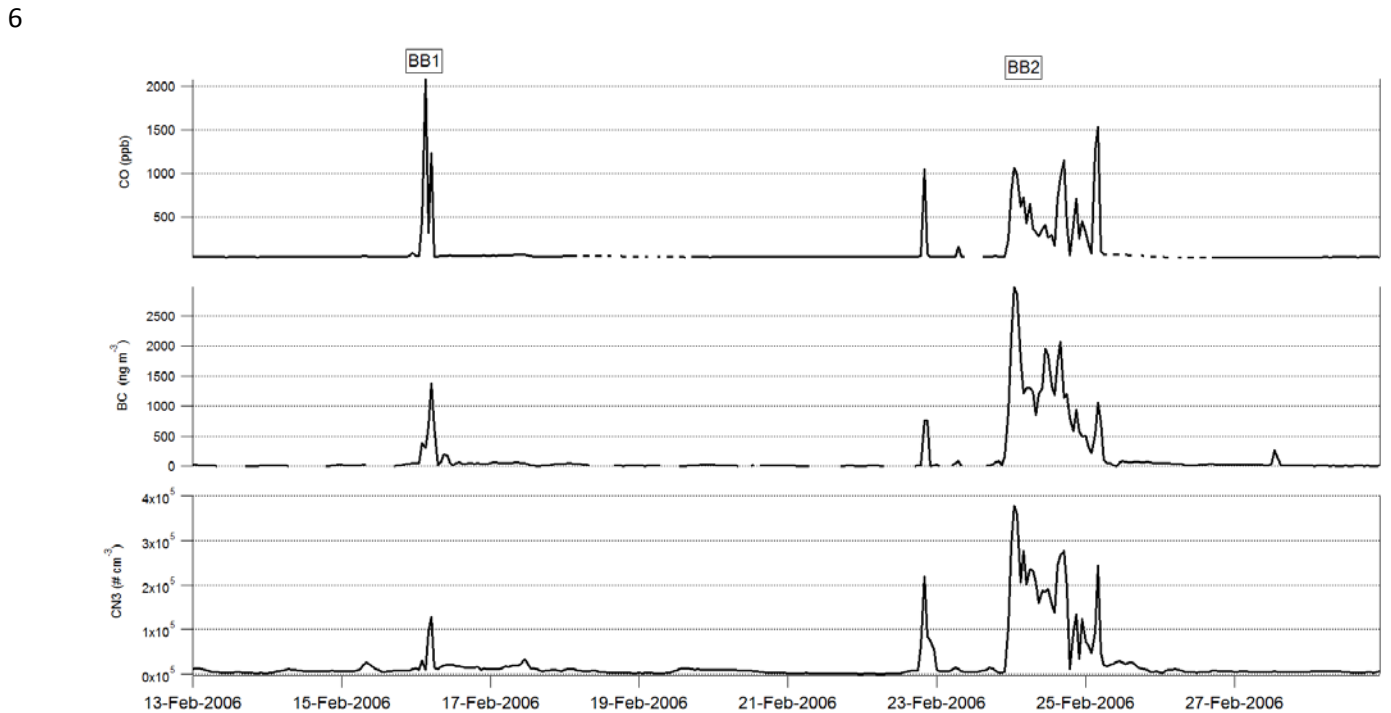

7  
8 *Figure 1. Time series of observed carbon monoxide (CO)- top, black carbon (BC)-middle and particles >3 nm*  
9 *(CN3)-bottom, for the study period. Taken from Lawson et al., 2015.*

10

## 11 Performance of the numerical meteorological modelling

12 The TAPM (Hurley, 2008) and CCAM (McGregor and Dix, 2008) meteorological simulations form an  
13 integral component of the analysis presented in our paper. As such, it is helpful to undertake  
14 qualitative and quantitative comparisons of modelled and observed meteorological parameters in  
15 order to assess the relative performance of each model. Although a full assessment of the  
16 performance of TAPM and CCAM were beyond the scope of this project (and not supported by a  
17 comprehensive set of observational data), we are able to assess model performance for hourly wind,  
18 temperature and humidity which were observed at the Cape Grim Base Line monitoring station. The  
19 results of a comparison of these data with the simulations of TAPM and CCAM for the period 13–27  
20 February 2006 are summarised below.

21 Figure 2 shows the scatter plots of observed and modelled wind, temperature and relative humidity  
22 and suggest that TAPM performs marginally than CCAM for the 10 m wind speed modelling with a  
23 higher coefficient of determination, a better intercept for the least squares regression line of best fit  
24 although a 5% lower slope. CCAM has better performance for the modelling of the screen

25 temperature (significantly better slope and intercept), and TAPM performs better for the modelling  
26 of relative humidity (note that this parameter also includes the effect of temperature).

27 Figure 3 shows the sample probability density functions (pdf) for the observation and model wind  
28 speed, wind direction, temperature and relative humidity time series. Note that the observed pdfs  
29 differ slightly between the TAPM and the CCAM plots because TAPM times are in Australian Eastern  
30 Standard while the CCAM plots are in UTC and the sampling periods are slightly different. In the  
31 following we consider the qualitative similarities and differences between the observed and  
32 modelled pdfs.

33 Figure 3 (top row) shows that CCAM has better matched the wind speed pdf, with a good  
34 representation of the mode at around  $9 \text{ m s}^{-1}$ . On the other hand TAPM mode occurs at  $7 \text{ m s}^{-1}$ . Both  
35 models simulate a mode in the wind direction pdf for the sector centred on  $75^\circ$  south (observed  
36 mode at  $90^\circ$  south. TAPM successfully models two modes in the west–south-west sector while  
37 CCAM simulates a single mode only (at  $225^\circ$ ). With respect to the screen temperature Figure 2 (third  
38 row) shows that CCAM has better simulated the width and peak of the observed temperature pdf,  
39 with TAPM under predicting the pdf width and over predicting the peak.

40 TAPM does a better job of modelling the RH pdf with CCAM under estimating the width of the pdf  
41 and overestimating the magnitude of the mode at 90% RH (Figure 3- bottom).

42 We complete this section by considering a suite of statistical measures of model performance. Figure  
43 4 shows 10 statistical measures- see Hurley et al. (2005), with more details of the metrics given in  
44 Willmott (1981) and Thorpe (1985) which can be used to give a quantitative comparison of the  
45 TAPM and CCAM 10 m wind speed simulations. Figure 4 (top row) shows that CCAM simulates the  
46 campaign mean wind speed to within -14% (thus a low bias) while TAPM has a low bias of 25%. The  
47 observed standard deviation of the wind speed is modelled to within -14% by TAPM and 3% by  
48 CCAM- see SKILLv in Figure 4 (bottom row). The root mean square error (RMSE) is  $2.5 \text{ m}^{-1}$  for TAPM  
49 and  $3.7 \text{ m s}^{-1}$  for CCAM. In this regard, a useful measure of skill is the ratio of the RMSE to the  
50 observed standard deviation (SKILLr in Figure 4) with SKILLr < 1 being desirable. It can be seen that  
51 both models have satisfied this criteria and that TAPM has performed better than CCAM with  
52 respect to this metric. Consideration of the RMSE metrics also indicate general good skill from both  
53 models, and with TAPM performing better than CCAM. The Index of Agreement (IOA; unity is ideal)  
54 also provides evidence of good model performance.

55 Figure 5 shows the same statistical measures for screen temperature and again indicates skill in the  
56 modelling according to the metrics of Willmott (1981) and Thorpe (1985). Again the TAPM  
57 performance is slightly better than CCAM. Similar conclusions can be drawn with respect to the  
58 relative humidity (Figure 6).

59 In summary, a necessary condition is that the meteorological models are able to demonstrate  
60 reasonable skill in modelling the meteorological conditions within the vicinity of the smoke  
61 trajectories as they couple Cape Grim with the smoke source area on Robbin’s Island. The  
62 information presented above is promising (although not a complete model verification), and does  
63 suggest that the TAPM simulations are slightly better than the CCAM simulations with respect to the  
64 low level wind, temperatures and relative humidity.

65

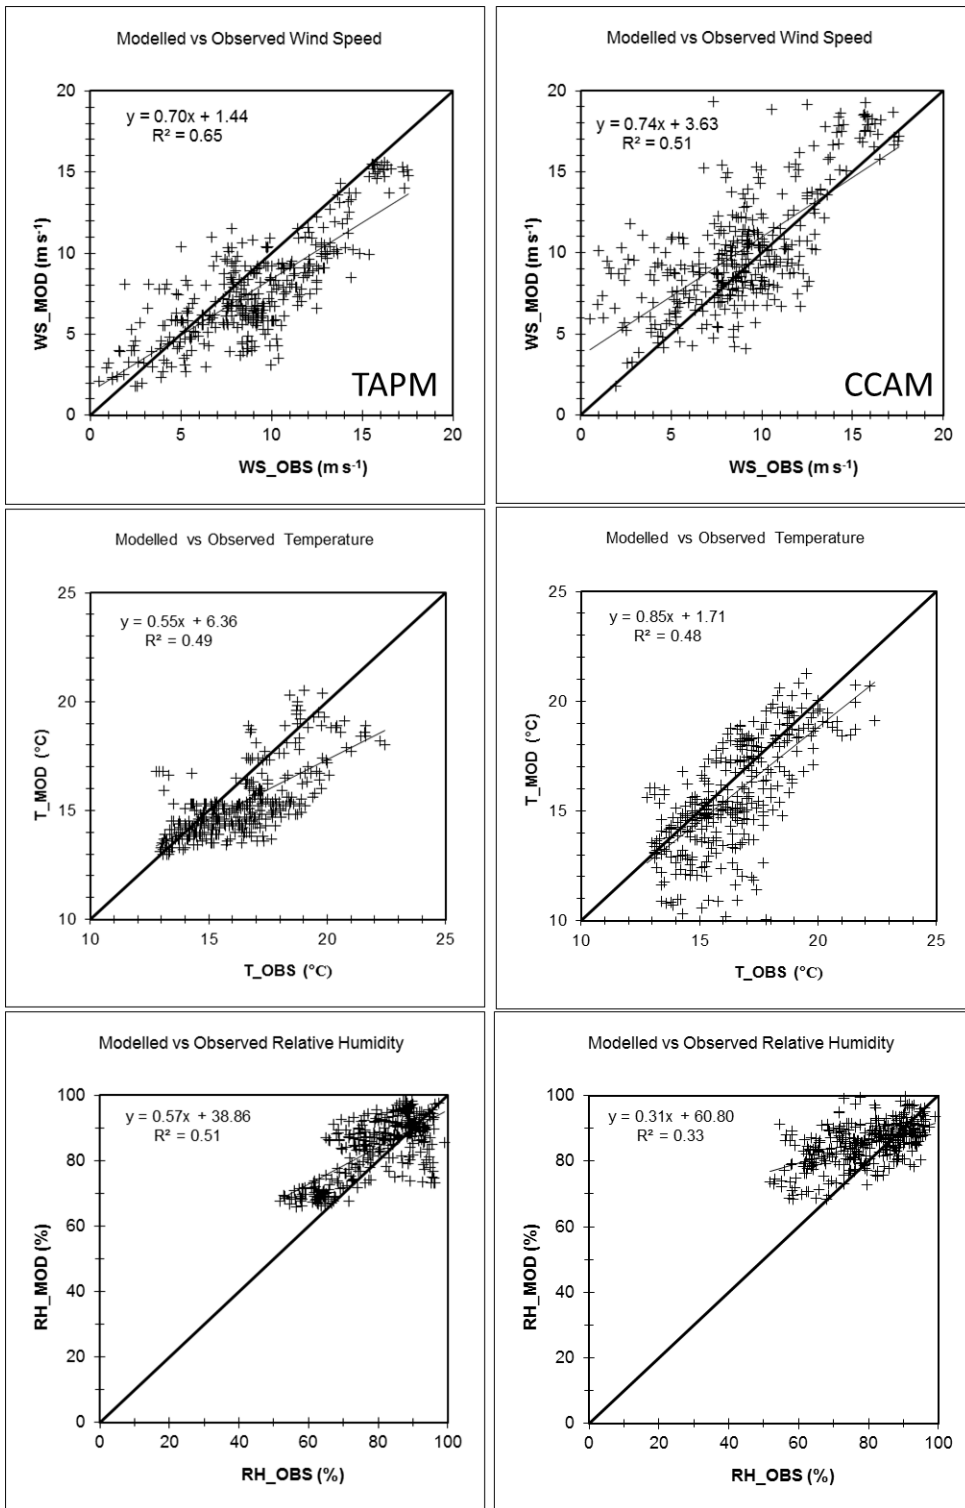

67

68 *Figure 2. Scatter plots of (by row) observed and modelled 10 m wind speed, screen temperature, relative*  
69 *humidity for (by column). TAPM is shown in the first column and CCAM is shown in the second column.*

70

71

72

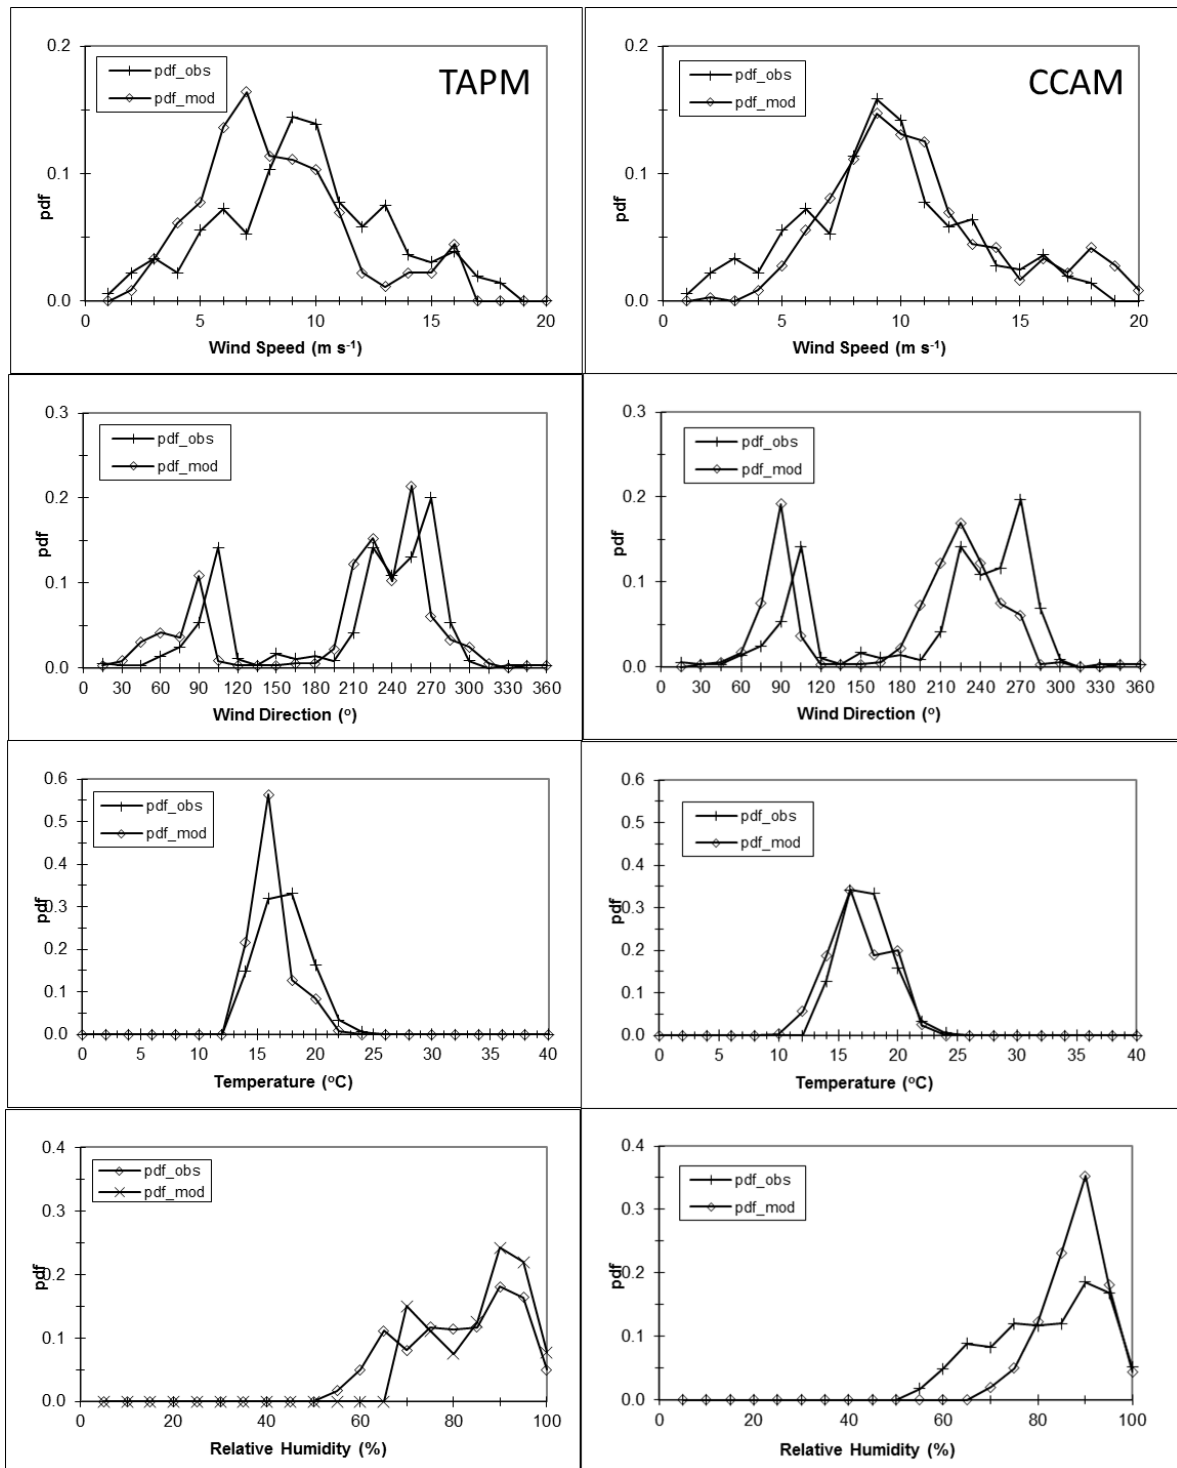

73

74 *Figure 3. Probability density functions of observed and modelled (by row) 10 m wind speed, 10 m wind*  
 75 *direction, screen temperature and screen relative humidity. TAPM results are shown in the first column and*  
 76 *CCAM results in the second column.*

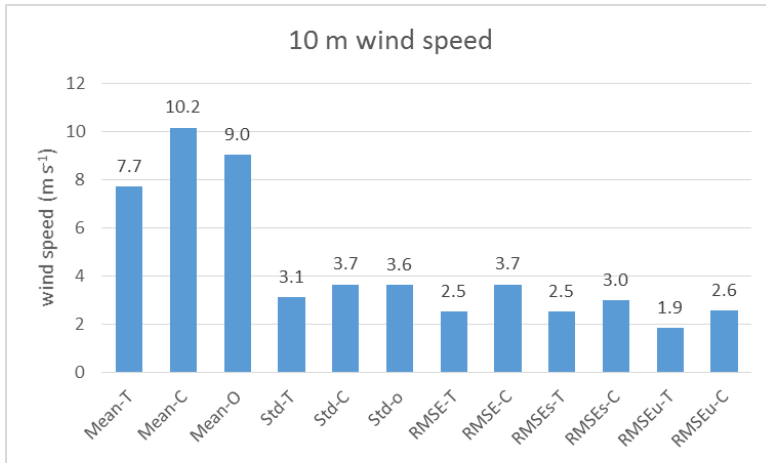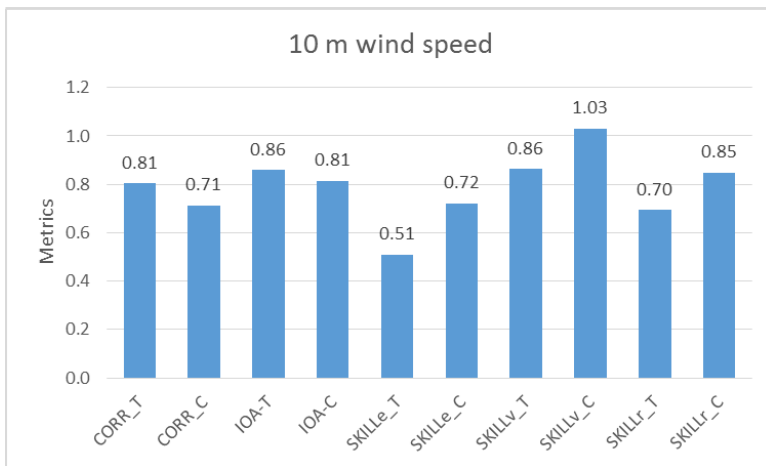

77

78 *Figure 4. Statistical measures for quantitative comparison of the TAPM and CCAM 10 m wind speed*  
 79 *simulations. T=TAPM, C=CCAM, O=Observations. Top- Mean-T, Mean-C, Mean-O; mean TAPM, CCAM and*  
 80 *observed 10 m wind speed. Std-T/C standard deviation of the modelled wind (TAPM; CCAM), RMSE- root mean*  
 81 *square error; RMSEs- systematic root mean square error; RMSEu- unsystematic root mean square error.*  
 82 *Bottom- the metrics are CORR correlation coefficient; IOA- index of agreement; SKILLE = RMSEu/STD-O, SKILLv =*  
 83 *Std-model/Std-obs, SKILLr = RMSE/Std-O.*

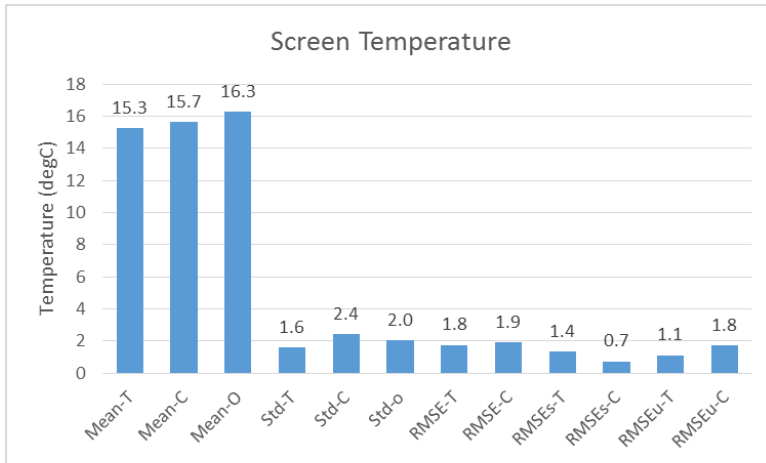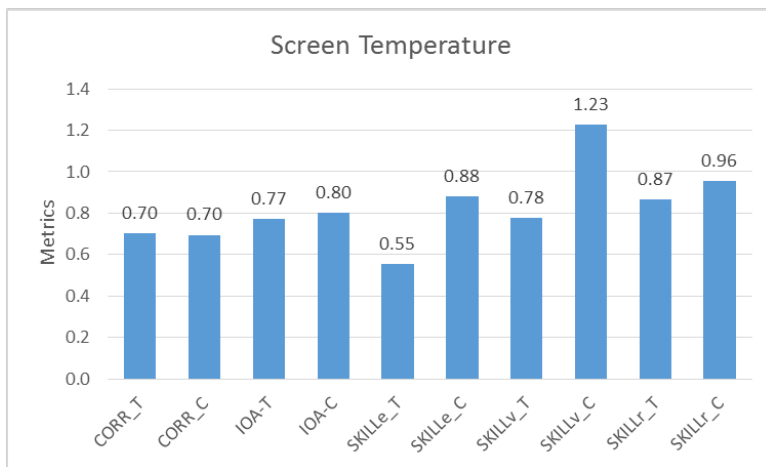

84

85 *Figure 5. Statistical measures for quantitative comparison of the TAPM and CCAM screen temperature.*  
 86 *T=TAPM, C=CCAM, O=Observations. Top- Mean-T, Mean-C, Mean-O; TAPM, CCAM and observed screen*  
 87 *temperature. Std-T/C standard deviation of the modelled temperature (TAPM; CCAM), RMSE- root mean*  
 88 *square error; RMSEs- systematic root mean square error; RMSEu- unsystematic root mean square error.*  
 89 *Bottom- the metrics are CORR correlation coefficient; IOA- index of agreement; SKILLE = RMSEu/STD-O, SKILLv =*  
 90 *Std-model/Std-obs, SKILLr = RMSE/Std-O.*

91

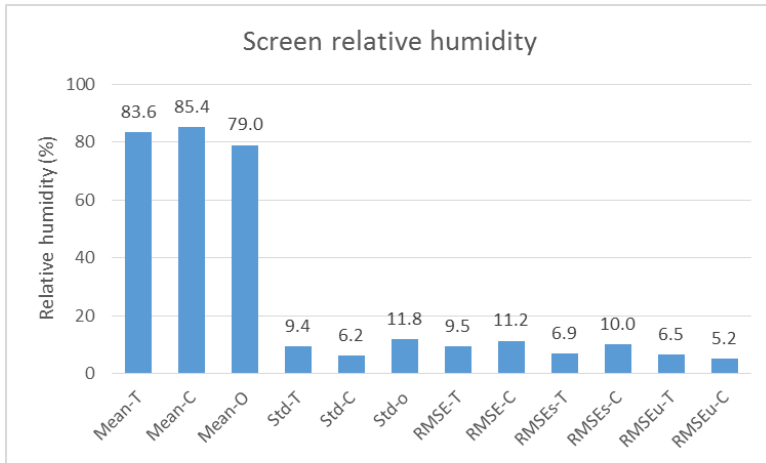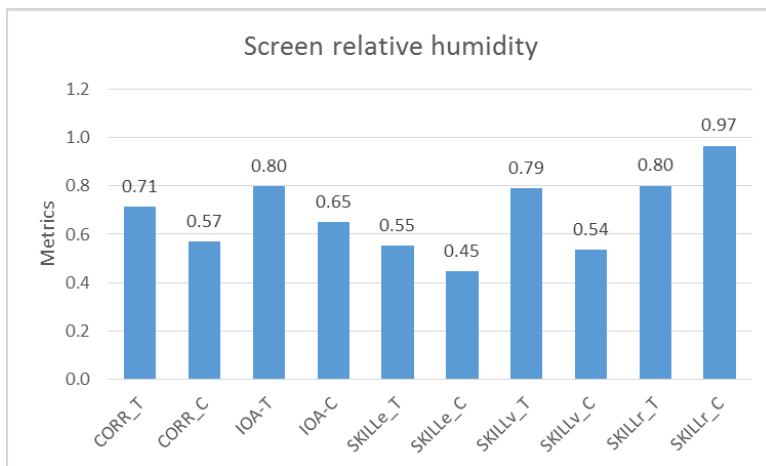

92

93 *Figure 6. Statistical measures for quantitative comparison of the TAPM and CCAM screen relative humidity.*  
 94 *T=TAPM, C=CCAM, O=Observations. Top- Mean-T, Mean-C, Mean-O; mean TAPM, CCAM and observed relative*  
 95 *humidity. Std-T/C standard deviation of the modelled relative humidity (TAPM; CCAM), RMSE- root mean*  
 96 *square error; RMSEs- systematic root mean square error; RMSEu- unsystematic root mean square error.*  
 97 *Bottom- the metrics are CORR correlation coefficient; IOA- index of agreement; SKILLE = RMSEu/STD-O, SKILLv =*  
 98 *Std-model/Std-obs, SKILLr = RMSE/Std-O.*

99

100 Atmospheric soundings were undertaken at least once per day (000 UTC) for the majority of days in  
 101 the period 8-21 February 2006. Sondes were released from the Cape Grim monitoring station and  
 102 returned height, pressure, temperature, humidity, wind speed and wind direction data at 10-20 m  
 103 intervals between the surface and about 3000 m. We have used the data to calculate potential  
 104 temperature and derived the potential temperature gradient using central differences over height  
 105 intervals of 30-40 m (to include some smoothing of the raw radiosonde data). The observed  
 106 boundary layer heights have been diagnosed by searching for positive gradients in the potential  
 107 temperature profile.

108 Figure 7 shows the modelled (TAPM and CCAM) hourly PBL time series with the spot hourly PBL  
 109 observations superimposed on the plot. The figure is helpful because it shows the significantly  
 110 hourly variability in the modelled PBL- which because Cape Grim is strongly influenced by maritime  
 111 air, does not strongly follow the typical diurnal variation of PBL growth and collapse associated with  
 112 sensible heating and long wave radiation cooling over land. Figure 7 suggests that both models have  
 113 captured important features in the observed PBL heights, including the period of low boundary layer  
 114 height between hours 168 and 264.

115 Figure 8 shows a scatter plot of the observed and modelled PBL heights and indicates that 71% of  
 116 the TAPM PBL heights lie within a factor of two of the observed and 79% of the CCAM PBL heights  
 117 are within a factor of two. This is a good result given the complexity of the observed meteorological  
 118 flows at the Cape Grim monitoring station.

119

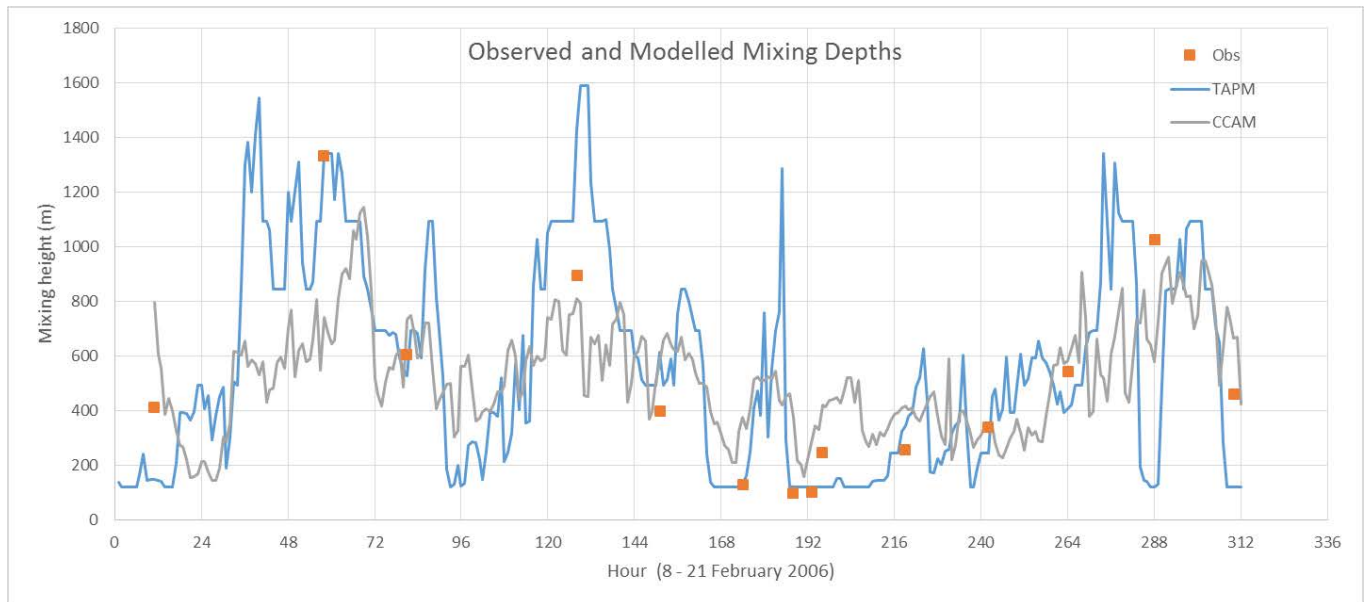

120  
 121 *Figure 7. Hourly time series of the modelled (TAPM and CCAM) PBL heights for the period 8 – 21 February 2006.*  
 122 *Also shown are PBL heights diagnosed from sonde data released periodically at Cape Grim during the study*  
 123 *period.*

124

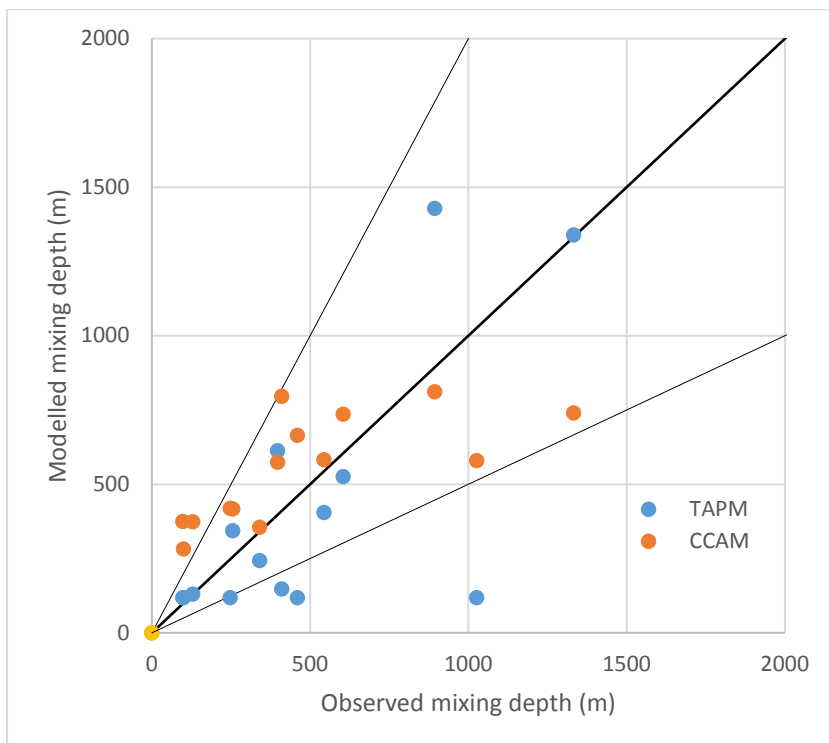

125  
 126 *Figure 8. Scatter plot of observed and modelled PBL heights for hours corresponding to sonde releases at Cape*  
 127 *Grim in February 2006.*

128



129 **Performance of TAPM-CTM for background O<sub>3</sub>**

130 The model generally captures background O<sub>3</sub> very well. The average modelled mean O<sub>3</sub> during  
131 background (non BB) periods was 17.7 ppb versus 16.6 ppb observed, with a coefficient of  
132 determination of 0.4. The scatter plot below (Figure 9) shows that all modelled concentrations are  
133 within a factor of 2 of observations (hourly data). Further, the campaign average diurnal 1 hour O<sub>3</sub>  
134 (observed vs modelled) (Figure 10) indicates maximum differences of 2 ppb (< 15% of the hourly  
135 mean).

136

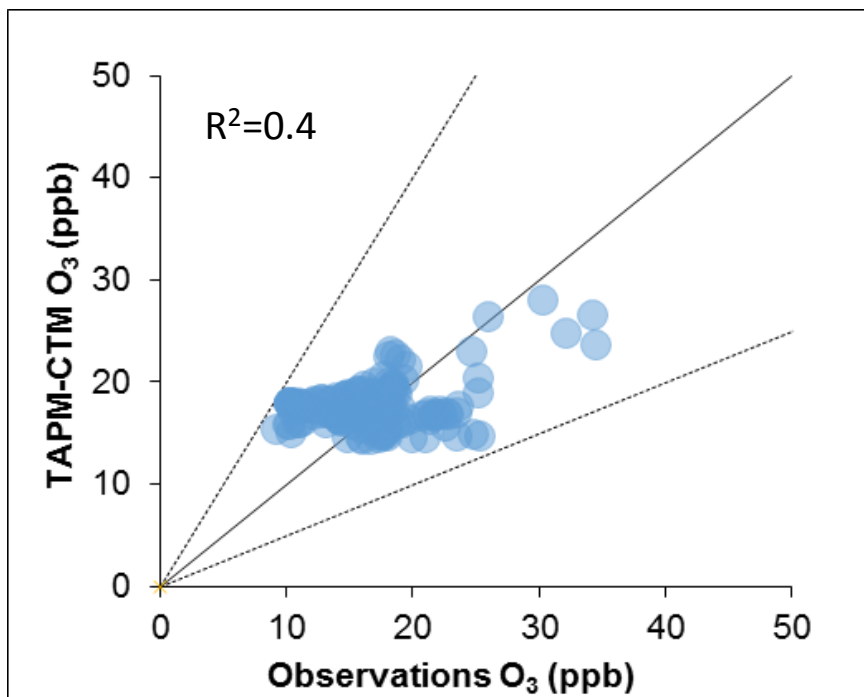

137

138 *Figure 9. Hourly observed versus modelled O<sub>3</sub> concentrations for background (non-BB) periods*

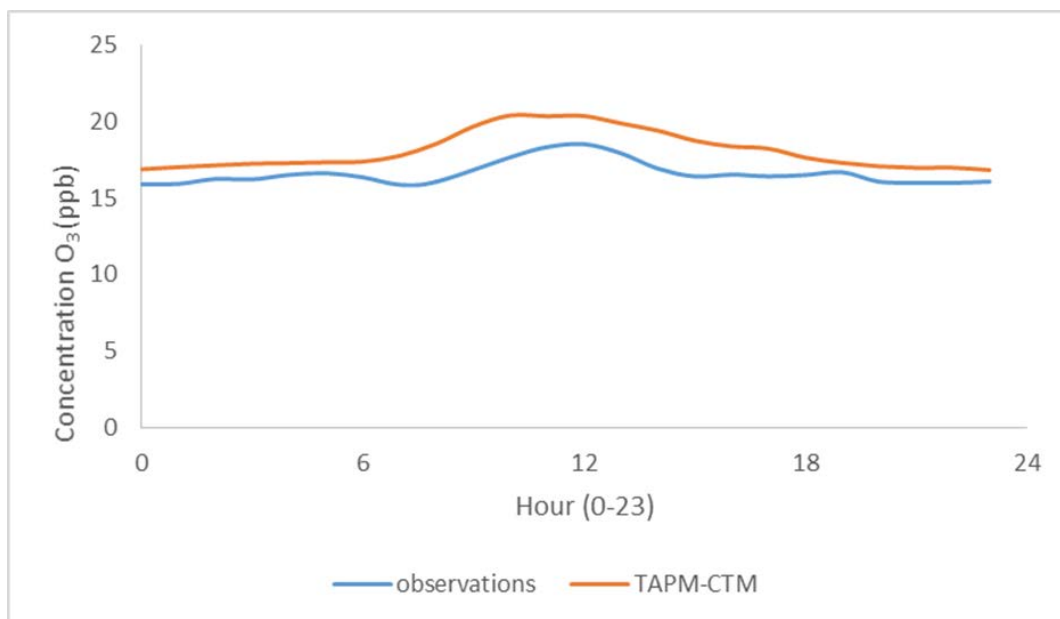

139

140 *Figure 10. Diurnal observed and modelled (TAPM-CTM) concentration for background (non-BB) periods*

141

## 142 Performance of TAPM-CTM and CCAM-CTM for different Emission 143 Factor Scenarios

144

145 A series of qualitative and quantitative performance measures have been provided for the different  
146 EF scenarios. These measures follow the framework discussed in Dennis et al. (2010), and use the  
147 performance goals described in Boylan and Russell (2006). These measures provide quantitative  
148 evidence that the best overall agreement with the observations for both primary (EC/CO) and  
149 secondary (O<sub>3</sub>) species is for the TAPM-CTM run with MCE = 0.89. This is discussed further below,  
150 and in the Supplementary material.

151

152 Figure 11 shows the quantile–quantile plots of observed and modelled BC/CO for eight model  
153 scenarios. For clarity we have plotted the concentration pairs corresponding to each decile in the  
154 range 20 to 100%. Note the log scale on both axes. The solid line is 1:1 and the dotted lines delineate  
155 a factor of two agreement between observed and modelled BC/CO.

156

157 The quantile-quantile plots compare the observed and modelled distributions of BC/CO and are  
158 useful for the current morphology where the configuration of a near field source, narrow  
159 meandering plume and single receptor make it very challenging for models to simulate the time-and-  
160 space coupled behaviour of the in-plume concentrations during plume strikes at the receptor.  
161 Additionally, because the modelled and observed concentrations of EC and CO from the fire are a  
162 strong function of the plume transport and mixing in addition to the EF, we consider the ratio of BC  
163 and CO because ratios of emitted gases and aerosols will be approximately conserved- provided in-  
164 plume chemical or physical transformation of these species is not significant, and provided the  
165 concentration of each species in the entrained background air is well known.

166

167 Figure 11 shows that the BC/CO distributions for each MCE scenario show an approximate linear  
168 relationship between the observed and modelled ratios for the first two thirds of each distribution  
169 (for BC/CO < 1 ng m<sup>-3</sup> ppb<sup>-1</sup>) before the modelled distributions of BC/CO distributions show reduced  
170 sensitivity compared to the observed. The TAPM-CTM simulation with MCE=0.89 has the most  
171 modelled percentile data points within a factor of two of the observations (6 percentile data points,  
172 from 0.3 – 0.8) for BC/CO ratio. The second best agreement with the observations was using CCAM-  
173 CTM with MCE = 0.89. Several of the TAPM-CTM and CCAM-CTM model runs overestimated the  
174 EC/CO ratio by a factor of up to 8 for MCE=0.95, while the runs with no fire underestimates the  
175 observed ratios by a factor of two or larger for the majority of the data points. Overall this indicates  
176 that using EF corresponding to an MCE of 0.89 gives the best agreement with the observations for  
177 the majority of the BC/CO ratios. Both TAPM-CTM and CCAM-CTM overestimated the ratio at the  
178 lowest (0.2 percentile) ratio values, and underestimated the ratio at the highest (1) percentile ratio.

179

180 Figure 11 also suggests that the model performance may be limited by the use of a single MCE for a  
181 given model scenario with the best model performance at the highest BC/CO being for the  
182 MCE=0.95 scenarios, and with the lower MCE scenarios performing better at the lower BC/CO ratios.

183

184 Figure 12 and Figure 13 respectively show the mean fractional bias (MFB) and mean fractional error  
185 (MFE) of the modelled EC/CO simulations. Following Boylan and Russell (2006) we define MFB and  
186 MFE as follows.

187

$$188 \quad MFB = 100\% \times \frac{2}{N} \sum \frac{(M_i - O_i)}{(M_i + O_i)}$$

189

190

$$MFE = 100\% \times \frac{2}{N} \sum \frac{|M_i - O_i|}{(M_i + O_i)}$$

191

192

193

194

195

196

197

198

199

200

201

202

203

where  $M_i$  and  $O_i$  are the  $i^{\text{th}}$  model–observation concentration pair (here coupled in time and space), and  $N$  is the number of data points. Guidance with respect to model performance is given by the criteria (outer lines) and goal (inner lines) which asymptote from a magnitude of 2.0 for  $EC/CO < 1.0$   $\text{ng m}^{-3} \text{ppb}^{-1}$  to 0.15 and 0.3 (MFB) and 0.35 and 0.5 (MFE) in the limit of large  $EC/CO$  (Boylan and Russell, 2006).

Figure 12 shows that the TAPM-CTM; MCE= 0.89 scenario has the smallest MFB, followed by CCAM-CTM; MCE= 0.89. Only the no-fire and MCE= 0.89 scenarios fall within the defined goal. Figure 13 shows the MFE and indicates that all of the simulations are challenged by the defined goal, while only the TAPM-CTM; MCE= 0.89 and the no-smoke scenarios fall within the defined criteria.

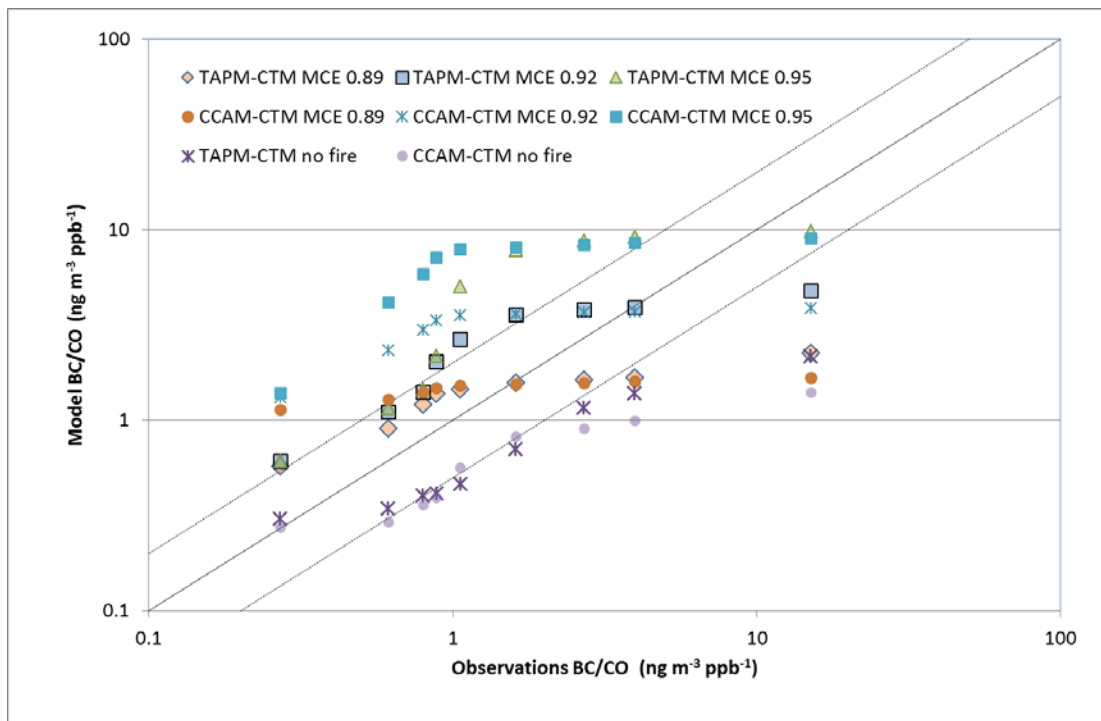

204

205

206

207

208

209

Figure 11. Quantile-quantile plots of observed and modelled BC/CO ratios for the TAPM-CTM and CCAM-CTM simulations. For each scenario, the model-data pairs correspond to the following percentiles- 0.2, 0.3, 0.4, 0.5, 0.6, 0.7, 0.8, 0.9 and 1. Note log scale on both axes. Solid line is 1:1 and dotted lines show performance within a factor of two.

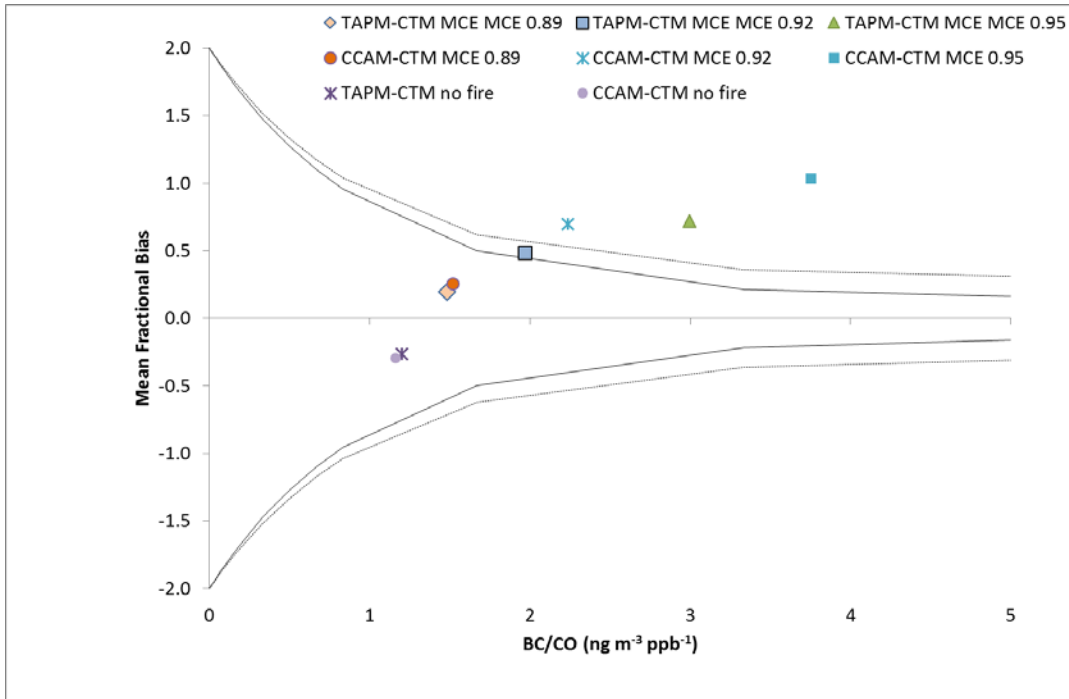

210

211 *Figure 12. Mean fractional bias for BC/CO. Dotted and solid lines define the performance criteria and goal.*

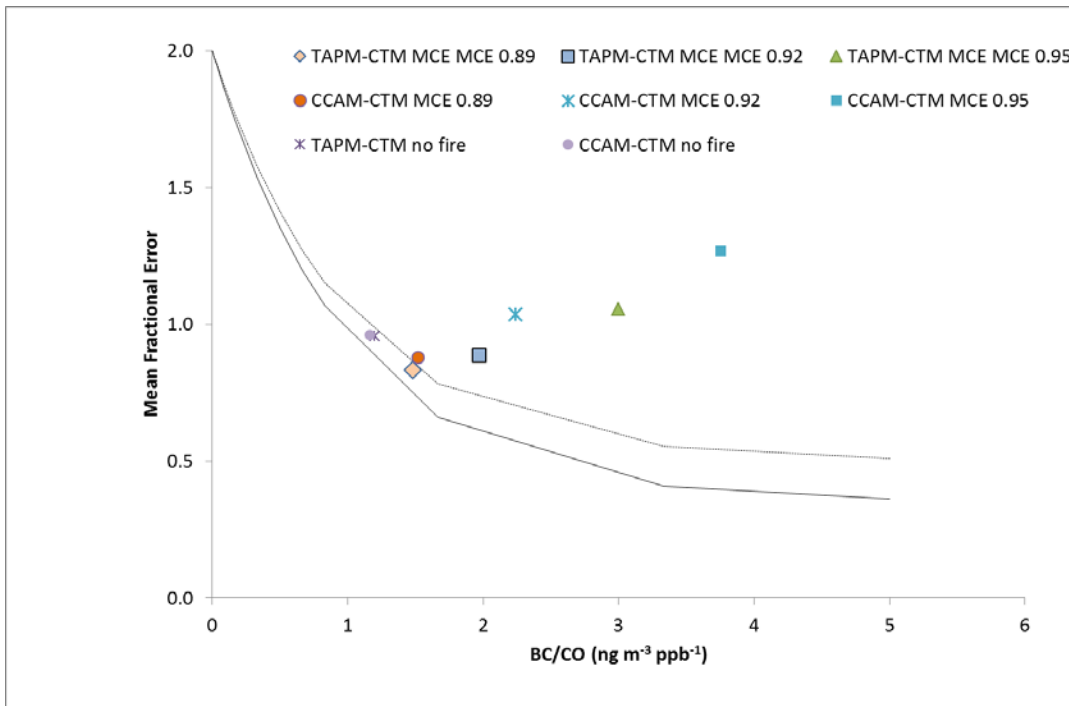

212

213 *Figure 13. Mean fractional error for BC/CO. Dotted and solid lines define the performance criteria and goal.*

214 With respect to O<sub>3</sub>, we analysed the entire data series (both the BB and background periods)  
 215 because urban air (in non BB periods) represents a significant source of O<sub>3</sub> at Cape Grim, and the test  
 216 of the models is to reproduce O<sub>3</sub> from fire as well as from other sources.

217

218 The quantile-quantile plots in Figure 14 and Figure 15 show that the TAPM-CTM; MCE=0.89 scenario  
 219 lies close to the 1:1 line for all of the sampled percentiles, and is in best agreement with  
 220 observations. On the other hand, the MCE=0.92 and MCE=0.95 runs both for TAPM-CTM and CCAM-  
 221 CTM predict depletion of O<sub>3</sub>, an event which is not observed, as discussed in the manuscript. With

222 the exception of these anomalous model depletion events, all modelled percentiles fall well within a  
223 factor of two of the observations.

224

225 Figure 16 shows the MFB for O<sub>3</sub> and indicates that the lowest MFB was for TAPM-CTM; MCE= 0.92.  
226 All but one scenario was able to simulate the one-hour O<sub>3</sub> with a MFB which fell within the range  
227 ±0.06. The MFB from all of the simulations fall well within the performance criteria and goal.

228

229 Figure 17 shows the MFE for O<sub>3</sub> and indicates that all MFE values are between 0.18- 0.29, again well  
230 with the performance criteria and goals. The MFE for TAPM-CTM; MCE=0.89 was 0.2, falling at the  
231 lower end of the MFE generating by our suite of simulations.

232

233

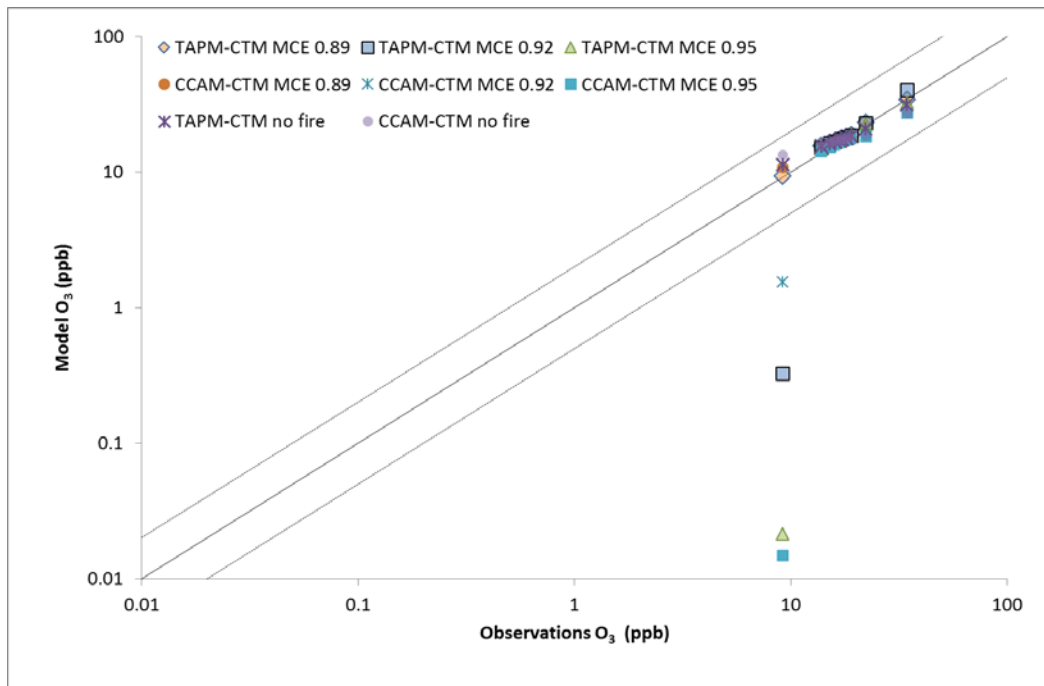

234

235 *Figure 14. Quantile-quantile plots of observed and modelled O<sub>3</sub> for the TAPM-CTM and CCAM-CTM simulations.*  
236 *For each scenario, the model-data pairs correspond to the following percentiles- 0.2, 0.3, 0.4, 0.5, 0.6, 0.7, 0.8,*  
237 *0.9 and 1. Note log scale on both axes. Solid line is 1:1 and dotted lines show performance within a factor of*  
238 *two.*

239

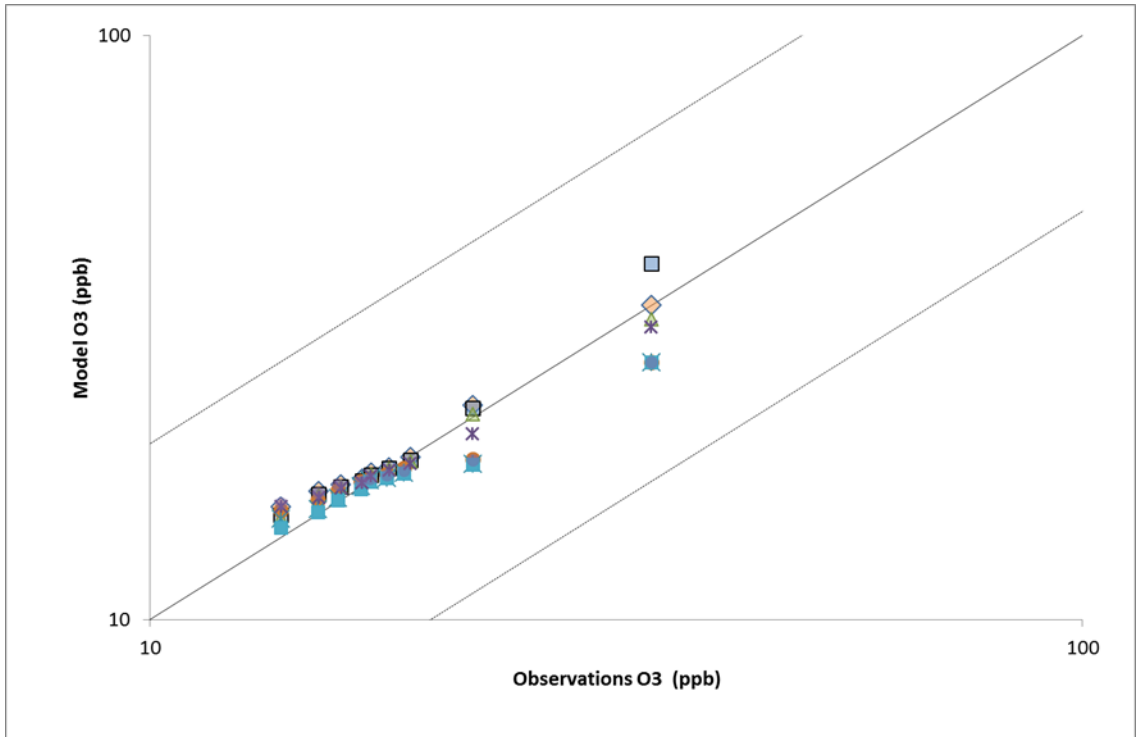

240

241 *Figure 15. Quantile-quantile plots of observed and modelled O<sub>3</sub> for the TAPM-CTM and CCAM-CTM simulations.*  
 242 *The plot is similar to Figure 14 above but with smaller concentration range so detail can be seen.*

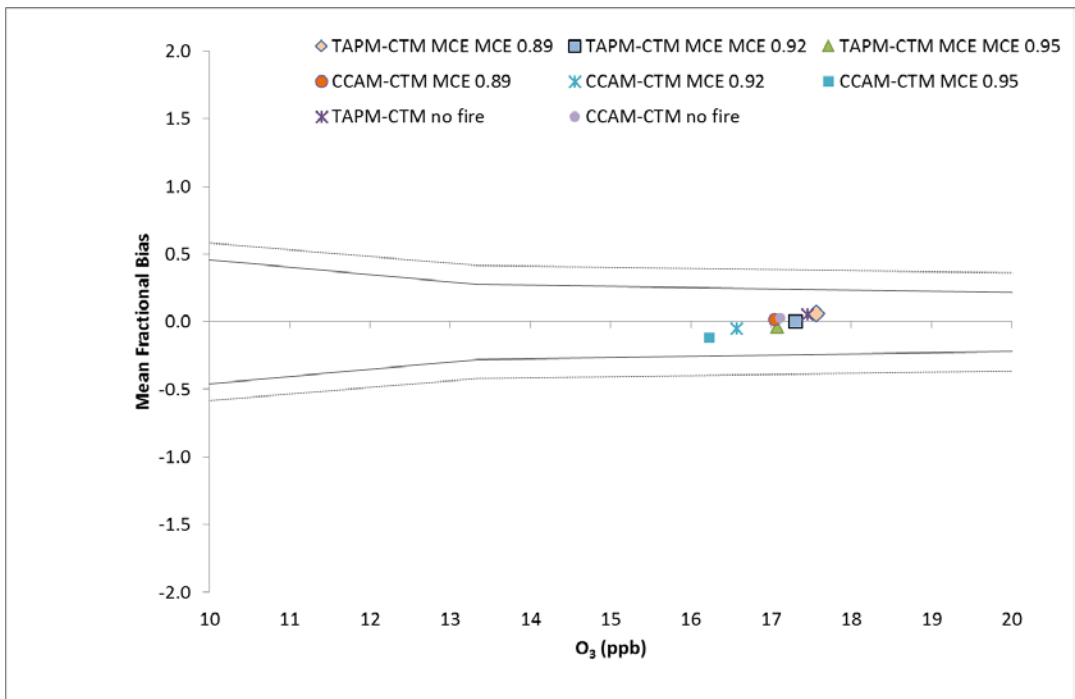

243 *Figure 16 . Mean fractional bias for O<sub>3</sub>. The dotted and solid lines define the performance criteria and goal.*

244

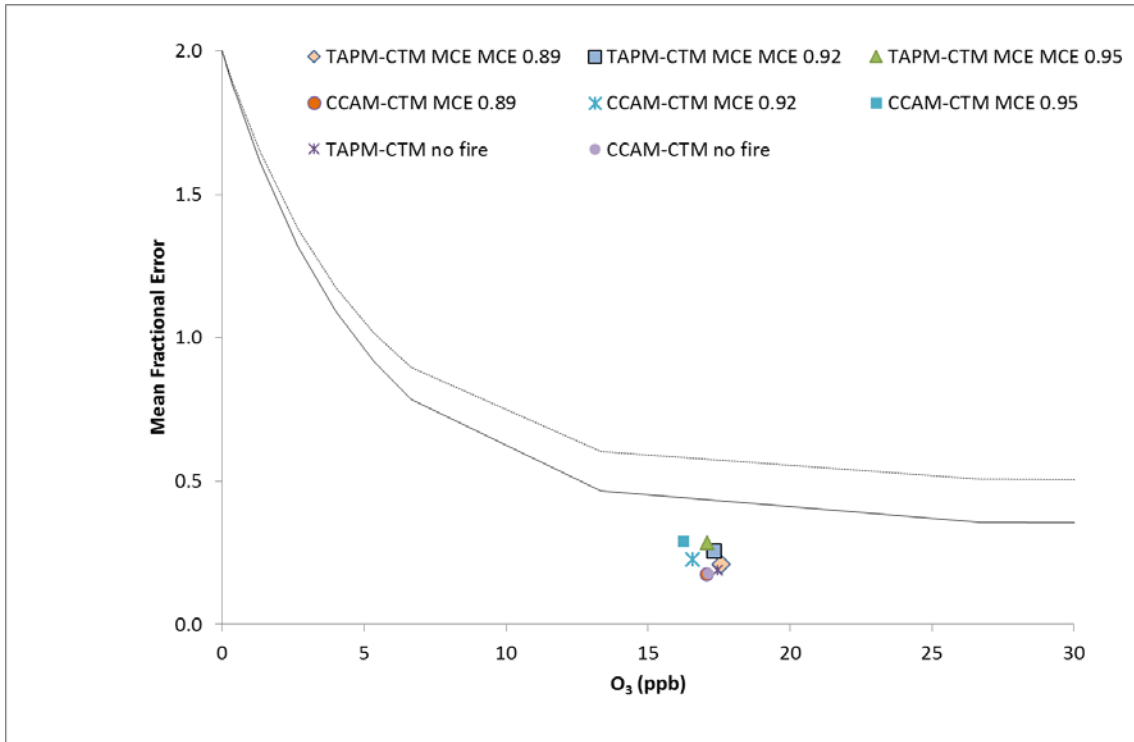

245

246 *Figure 17. Mean fractional error for O<sub>3</sub>. The dotted and solid lines define the performance criteria and goal.*

247 In summary, the quantile-quantile plots for EC/CO (fire periods) and O<sub>3</sub> (all periods) demonstrate  
 248 that, generally, the TAPM-CTM MCE=0.89 scenario is in best agreement with observations. This  
 249 scenario also has the lowest MFB and MFE for EC/CO, and small values of MFB and MFE for O<sub>3</sub> which  
 250 fall well within our performance criteria and goals. Additionally, this scenario did not generate the  
 251 anomalous depletion of O<sub>3</sub> as modelled by the MCE=0.92 and MCE=0.95 scenarios.

252 Performance of TAPM-CTM and CCAM-CTM for BB2

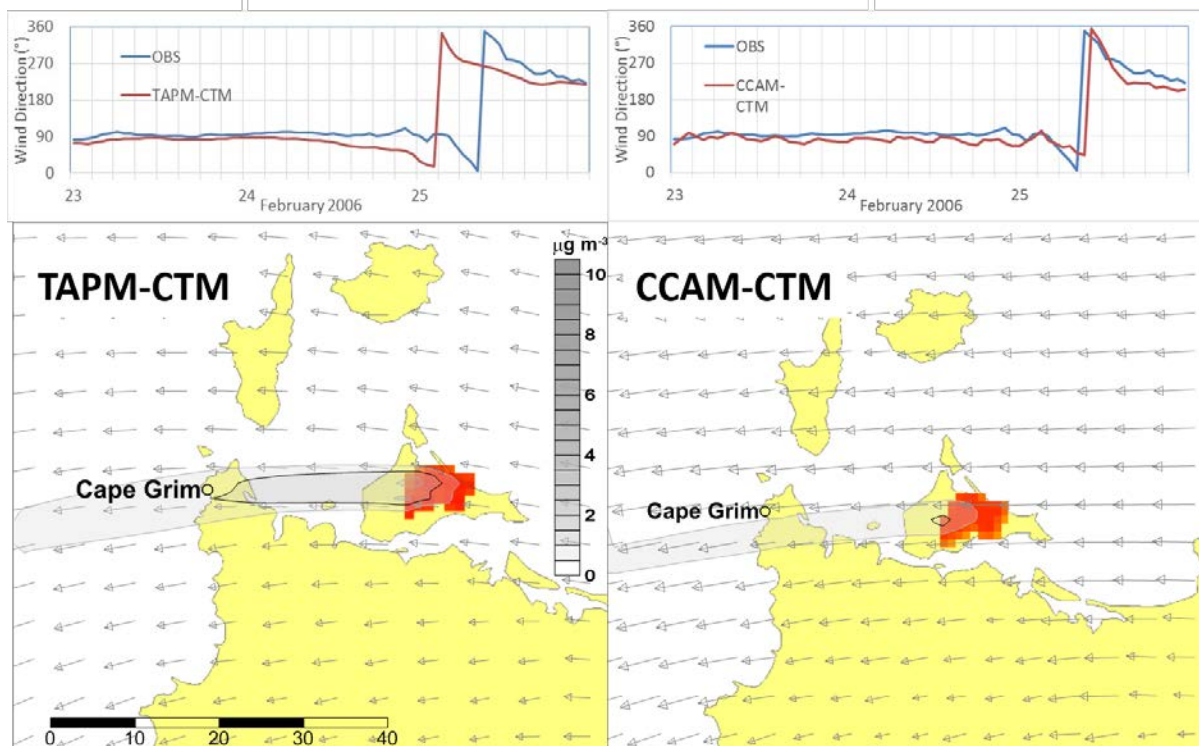

253  
 254 *Figure 18. Wind direction and EC concentrations for TAPM-CTM and CCAM-CTM at 05:00 on the 24 February*  
 255 *during BB2.*

256 Model output of TAPM-CTM and CCAM-CTM during BB1 as discussed in Section 3.1 of the  
 257 manuscript

258

259 **References**

260

261 Hurley, P., 2008. Development and verification of TAPM. *Nato Sci Peace Secur*, 208-216.  
 262 Hurley, P.J., Physick, W.L., Luhar, A.K., Edwards, M., 2005. The air pollution model (TAPM) version 3.  
 263 Part 2, Summary of some verification studies. . CSIRO, CSIRO Atmospheric Research, Aspendale,  
 264 Victoria 3195 Australia.  
 265  
 266 McGregor, J.L., Dix, M.R., 2008. An updated description of the Conformal-Cubic atmospheric model.  
 267 *High Resolution Numerical Modelling of the Atmosphere and Ocean*, 51-75.  
 268 Thorpe, A.J., 1985. *Mesoscale Meteorological Modelling* By R. A. Pielke. Academic Press, 1984, Pp.  
 269 612, £55.50, US\$79. *Q J Roy Meteor Soc* 111, 671-672.  
 270 Willmott, C.J., 1981. ON THE VALIDATION OF MODELS. *Physical Geography* 2, 184-194.  
 271 Akagi, S.K., Yokelson, R.J., Wiedinmyer, C., Alvarado, M.J., Reid, J.S., Karl, T., Crouse, J.D.,  
 272 Wennberg, P.O., 2011. Emission factors for open and domestic biomass burning for use in  
 273 atmospheric models. *Atmospheric Chemistry and Physics* 11, 4039-4072.  
 274 Boylan, J.W., Russell, A.G., 2006. PM and light extinction model performance metrics, goals, and  
 275 criteria for three-dimensional air quality models. *Atmospheric Environment* 40, 4946-4959.



276 Castellanos, P., Boersma, K.F., van der Werf, G.R., 2014. Satellite observations indicate substantial  
277 spatiotemporal variability in biomass burning NO<sub>x</sub> emission factors for South America. *Atmospheric*  
278 *Chemistry and Physics* 14, 3929-3943.

279 Dennis, R., Fox, T., Fuentes, M., Gilliland, A., Hanna, S., Hogrefe, C., Irwin, J., Rao, S.T., Scheffe, R.,  
280 Schere, K., Steyn, D., Venkatram, A., 2010. A framework for evaluating regional-scale numerical  
281 photochemical modeling systems. *Environ Fluid Mech* 10, 471-489.

282 Finch, D.P., Palmer, P.I., Parrington, M., 2014. Origin, variability and age of biomass burning plumes  
283 intercepted during BORTAS-B. *Atmos. Chem. Phys.* 14, 13789-13800.

284 Galbally, I.E., Meyer, C.P., Bentley, S.T., Lawson, S.J., Baly, S.B., 2007. Reactive gases in near surface  
285 air at Cape Grim, 2005-2006 – I E Galbally, C P Meyer, S T Bentley. *Baseline Atmospheric Program*  
286 *Australia 2005-2006*, 77-79.

287 Gras, J.L., 2007. Particles Program Report. *Baseline Atmospheric Program Australia 2005-2006*, 85-  
288 86.

289 Hurley, P., 2008. Development and verification of TAPM. *Nato Sci Peace Secur*, 208-216.

290 Hurley, P.J., Physick, W.L., Luhar, A.K., Edwards, M., 2005. The air pollution model (TAPM) version 3.  
291 Part 2, Summary of some verification studies. . CSIRO, CSIRO Atmospheric Research, Aspendale,  
292 Victoria 3195 Australia.

293 Korontzi, S., Ward, D.E., Susott, R.A., Yokelson, R.J., Justice, C.O., Hobbs, P.V., Smithwick, E.A.H., Hao,  
294 W.M., 2003. Seasonal variation and ecosystem dependence of emission factors for selected trace  
295 gases and PM<sub>2.5</sub> for southern African savanna fires. *Journal of Geophysical Research: Atmospheres*  
296 108, n/a-n/a.

297 Krummel, P.B., Fraser, P., Steele, L.P., Porter, L.W., Derek, N., Rickard, C., Dunse, B.L., Langenfelds,  
298 R.L., Miller, B.R., Baly, S.B., McEwan, S., 2007. The AGAGE in situ program for non-CO<sub>2</sub> greenhouse  
299 gases at Cape Grim, 2005-2006: methane, nitrous oxide, carbon monoxide, hydrogen, CFCs, HCFCs,  
300 HFCs, PFCs, halons, chlorocarbons, hydrocarbons and sulphur hexafluoride. *Baseline Atmospheric*  
301 *Program Australia 2005-2006*.

302 Lawson, S. J., Keywood, M. D., Galbally, I. E., Gras, J. L., Cainey, J. M., Cope, M. E., Krummel, P. B.,  
303 Fraser, P. J., Steele, L. P., Bentley, S. T., Meyer, C. P., Ristovski, Z., and Goldstein, A. H.: Biomass  
304 burning emissions of trace gases and particles in marine air at Cape Grim, Tasmania, *Atmos. Chem.*  
305 *Phys.*, 15, 13393-13411, 10.5194/acp-15-13393-2015, 2015.

306 McGregor, J.L., Dix, M.R., 2008. An updated description of the Conformal-Cubic atmospheric model.  
307 *High Resolution Numerical Modelling of the Atmosphere and Ocean*, 51-75.

308 Thorpe, A.J., 1985. *Mesoscale Meteorological Modelling* By R. A. Pielke. Academic Press, 1984, Pp.  
309 612, £55.50, US\$79. *Q J Roy Meteor Soc* 111, 671-672.

310 Urbanski, S.P., 2013. Combustion efficiency and emission factors for wildfire-season fires in mixed  
311 conifer forests of the northern Rocky Mountains, US. *Atmos. Chem. Phys.* 13, 7241-7262.

312 van Leeuwen, T.T., Peters, W., Krol, M.C., van der Werf, G.R., 2013. Dynamic biomass burning  
313 emission factors and their impact on atmospheric CO mixing ratios. *Journal of Geophysical Research-*  
314 *Atmospheres* 118, 6797-6815.

315 Willmott, C.J., 1981. ON THE VALIDATION OF MODELS. *Physical Geography* 2, 184-194.

316

317

318

319
